# Supplementary material for: Multiple single-crystal-to-single-crystal guest exchange in a dynamic 1D coordination polymer
Source: Royal Society of Chemistry journal article supplement (doi:10.1039/c5cc02372f), 2015-01-01

## Supporting Information for “Multiple Single-Crystal-to-Single-Crystal Guest Exchange in a Dynamic 1D Coordination Polymer.”

Javier Martí-Rujas,<sup>a\*</sup> Simone Bonafede,<sup>b</sup> Dorearta Tushi,<sup>b</sup> and Massimo Cametti<sup>b\*</sup>

<sup>a</sup> Center for Nano Science and Technology@Polimi, Istituto Italiano di Tecnologia, Via Pascoli 70/3, 20133 Milano, Italy.

<sup>b</sup> Dipartimento di Chimica Materiali e Ingegneria Chimica. “Giulio Natta”, Politecnico di Milano, Via L. Mancinelli 7, 20131 Milan, Italy.

### Content

#### Experimental

##### Synthesis of ligand L.

##### Scheme 1. Synthesis of ligand L.

**Figure S1.** Crystal structure of L. (a) View of one molecule of L. (b) Crystal packing of L viewed along the *b*-axis.

**Figure S2.** (a) Experimental XRPD pattern of the as-synthesized L (300 K). (b) Simulated XRPD pattern of L (100 K). (c) Experimental XRPD pattern of L (300 K) recrystallized using chloroform showing a good match with the simulated diffraction pattern from single crystal XRD data, indicating that the single crystal structure is representative of the bulk material.

**Figure S3.** SCXRD structure of 1·DCM viewed along the *a*-axis respectively.

**Figure S4.** SCXRD structure of 1·DCE viewed along the *a*-axis respectively.

**Figure S5.** TG plot of 1·TCM. The calculated weight loss obsd (calcd) and temperature are as follows:  $\text{ChCl}_3$  15% (17 %), 30 °C-150 °C.

**Figure S6.** SCXRD structure of 1. (a) and (c) packing viewed along the *a*- and *c*-axis respectively. (c) and (d) actual single crystal used for the heating experiment. Scale bar 100  $\mu\text{m}$ .

## Experimental

All the chemicals were purchased from Sigma-Aldrich and used without further modification.

X-ray powder diffraction measurements were carried out using a D2 Bruker diffractometer using the reflection mode at room temperature.

Thermogravimetical analysis was carried out on a TGA Q500 V20.13 Build 39 instrument. The sample was heated from 26 °C/min (2.00 °C/min) to 700.00 °C.

<sup>1</sup>H NMR experiments were performed on a Bruker Avance 400 MHz at 300K.

The heating experiments on microcrystalline samples were carried out in a furnace from r.t. to 280 °C at a heating rate of 4 °C/ min.

### Synthesis of ligand L.

Ligand **L** was characterized by reacting 1,4-diaminocyclohexane and 4-(3-pyridinyl)benzaldehyde in acetonitrile under refluxing conditions.

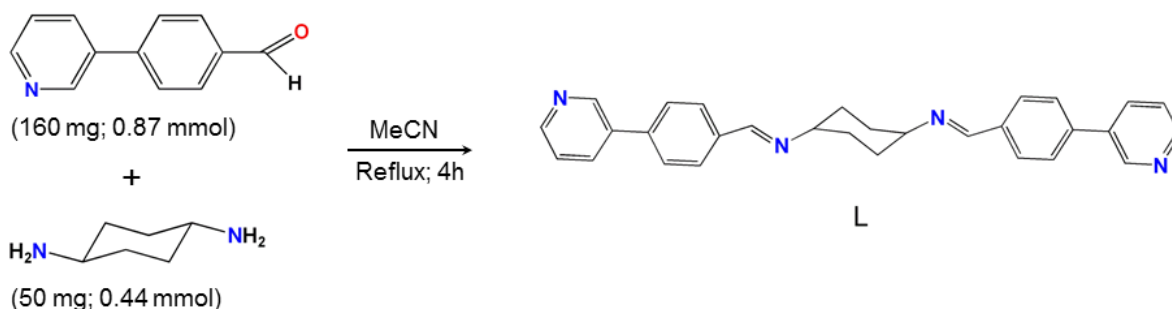

**Scheme 1.** Synthesis of ligand **L**.

<sup>1</sup>H NMR, elemental analysis and SCXRD. Single crystals were obtained by evaporating a CHCl<sub>3</sub> solution (5 mL) of **L** (20 mg) at room temperature. The crystal structure of **L** was determined by single crystal X-ray diffraction. **L** crystallizes in the triclinic *P*-1 space group.

Synthesis of **L**: 160 mg of 3-(4-formyl-phenyl)pyridine (0.87 mmol) and 50 mg of 1,4-diaminocyclohexane (0.44 mmol) were dissolved in 10 mL of MeCN. The solution was maintained under refluxing conditions for 4h and then left under stirring at r.t. overnight. The product, in the form of a

white precipitate, is filtered off and washed with Et<sub>2</sub>O. Yield = 75%. <sup>1</sup>H-NMR (CDCl<sub>3</sub>, 400 MHz): δ 8.86 (d, *J* = 1.8 Hz, 2H); δ 8.60 (dd, *J* = 4.8, 1.8 Hz, 2H); δ 8.41 (s, 2H); 7.88 (m, 6H); δ 7.63 (d, *J* = 8.2 Hz, 4H); δ 7.36 (dd, *J* = 7.9, 4.8 Hz, 2H); δ 3.35 (s, 2H); δ 1.88 (m, 8H). ESI-MS: M<sup>+</sup> = 444.23 calcd. for C<sub>30</sub>H<sub>28</sub>N<sub>4</sub>, found 445.42 [M+H]<sup>+</sup>; Elemental analysis calcd. (%) for C<sub>30</sub>H<sub>28</sub>N<sub>4</sub>·H<sub>2</sub>O C 77.89; H 6.54; N 12.11; found = C 77.14, H 6.30, N 12.79. Single crystals were grown by slow evaporation of a solution of **L** in trichloromethane. X-ray crystallographic data (100 K): *a* = 5.5990(4) Å *b* = 7.1074(5) Å *c* = 16.1003(11) Å; α = 92.646(4)° β = 98.583(4)° γ = 112.049(3)°; *V* = 583.53(7) Å<sup>3</sup>; and triclinic system in the *P*-1 space group.

**Formula for the calculation of the parameter R (see manuscript):**

$$R = \frac{\text{moles of guest}}{\text{moles of MOF units}} = \frac{\text{MW}_{\text{MOF units}} \cdot \text{Volume} \cdot [\text{guest}]_{\text{NMR}}}{(\text{mg}_{\text{tot}} - \text{MW}_{\text{guest}} \cdot \text{Volume} \cdot [\text{guest}]_{\text{NMR}})}$$

R is the ratio between the moles of guest solvent and the moles of the framework units

**MW**<sub>MOF units</sub> is the molecular weight of the L-ZnCl<sub>2</sub> unit;

**MW**<sub>guest</sub> is the molecular weight of the solvent guest;

**[guest]**<sub>NMR</sub> corresponds to the concentration of the guest solvent as measured by <sup>1</sup>H-NMR by comparison of the integral value of an internal standard;

**mg**<sub>tot</sub> is the total amount of material weighted;

**Volume** is the volume of the DMSO-d<sub>6</sub> used (500 μL + 5 μL of internal standard).

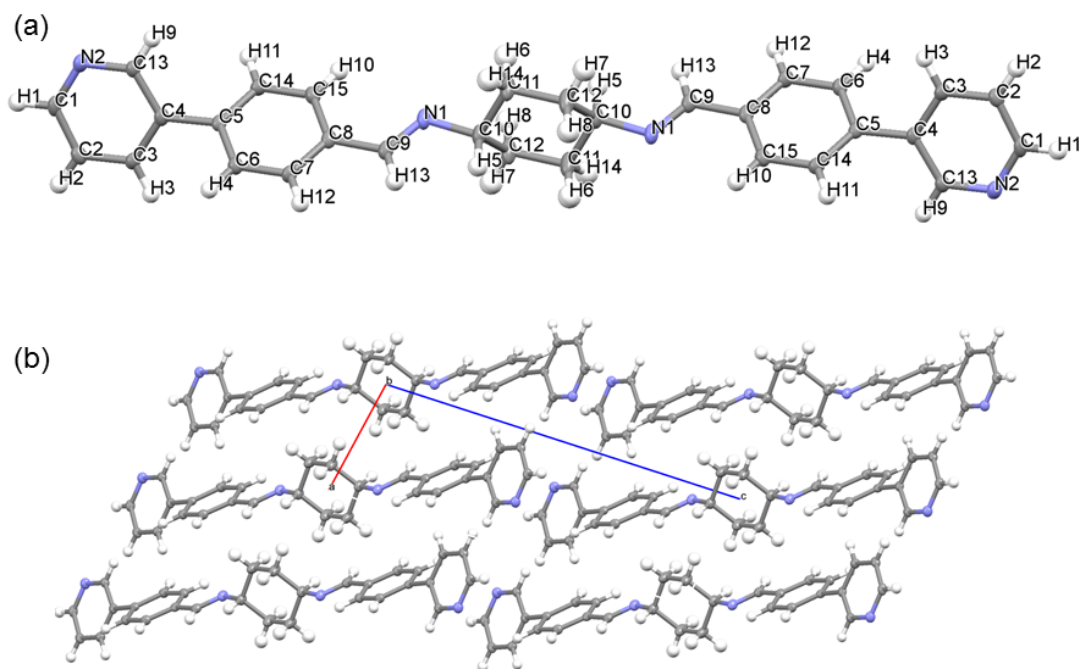

**Figure S1.** Crystal structure of **L**. (a) View of one molecule of **L**. (b) Crystal packing of **L** viewed along the *b*-axis.

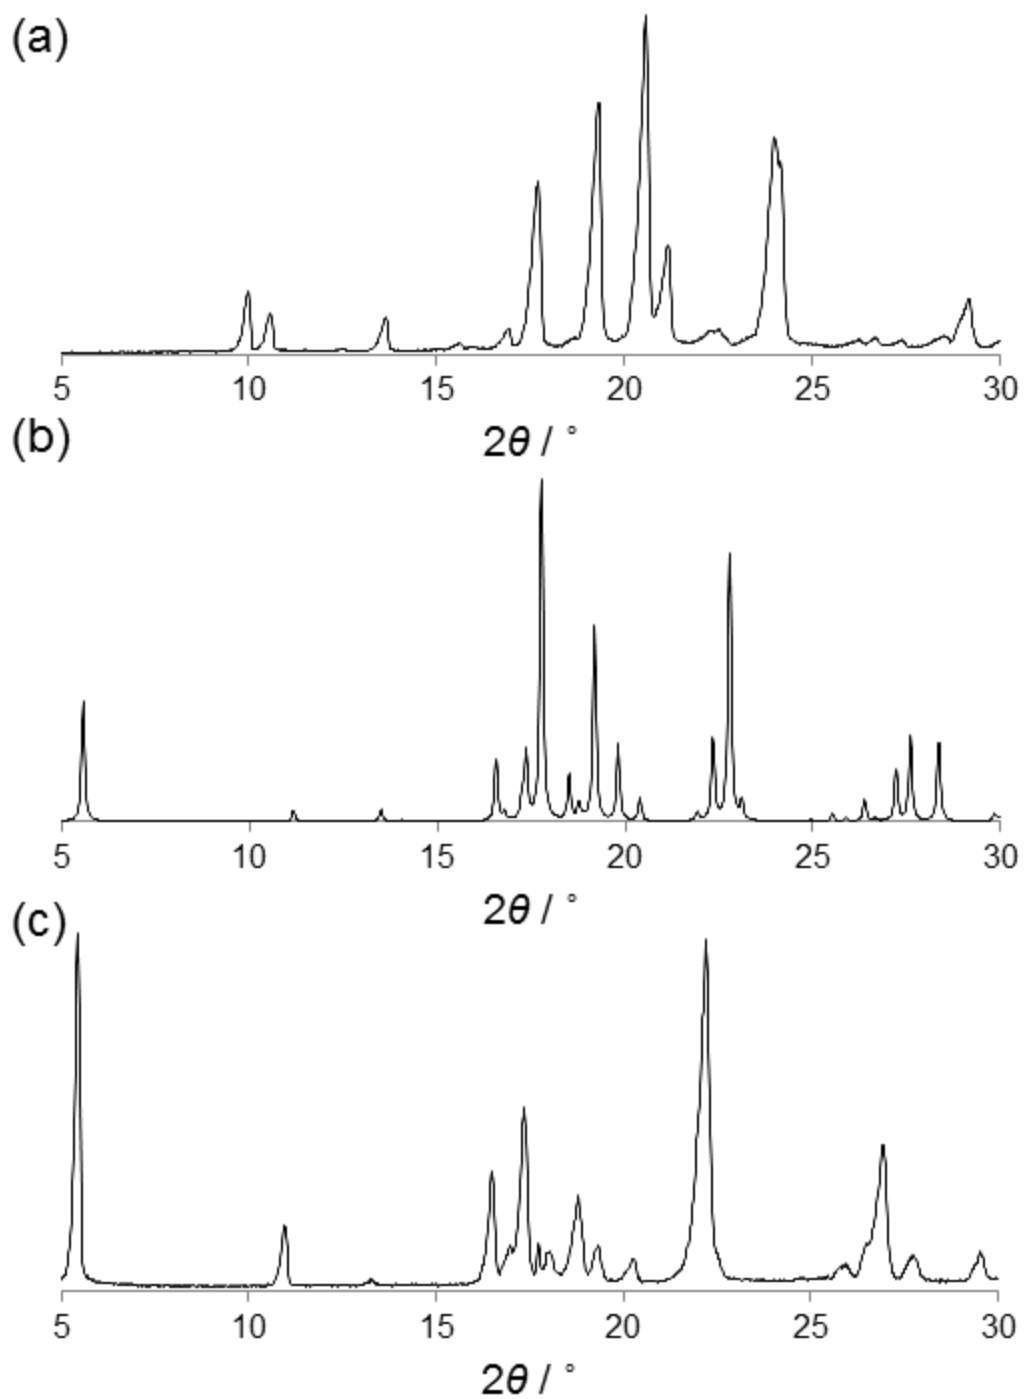

**Figure S2.** (a) Experimental XRPD pattern of the as-synthesized **L** (300 K). (b) Simulated XRPD pattern of **L** (100 K). (c) Experimental XRPD pattern of **L** (300 K) recrystallized using chloroform showing a good match with the simulated diffraction pattern from single crystal XRD data, indicating that the single crystal structure is representative of the bulk material.

**Synthesis of 1·TCM.** The 1D coordination network was prepared by treating **L** with  $\text{ZnCl}_2$  in a chloroform-nitrobenzene-methanol gradient solution and separated as single crystals with formula  $\{[(\text{ZnCl}_2)(\text{L})] \cdot (\text{TCM})\}_n$  (**1·TCM**,  $n =$  denotes a polymeric structure). The triple-layered solution was prepared by placing a chloroform solution (5mL) of **L** (0.045 mmol) at the bottom of the crystallization tube, a nitrobenzene layer in the middle (1 mL), and a methanol solution (1 mL) of  $\text{ZnCl}_2$  (0.045 mmol) as the top layer. Within one week large colourless single crystals were grown and isolated by filtration.

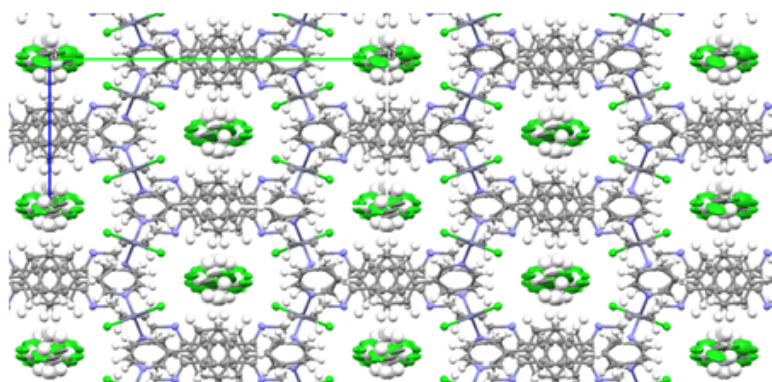

**Figure S3.** SCXRD structure of **1·DCM** viewed along the  $a$ -axis respectively.

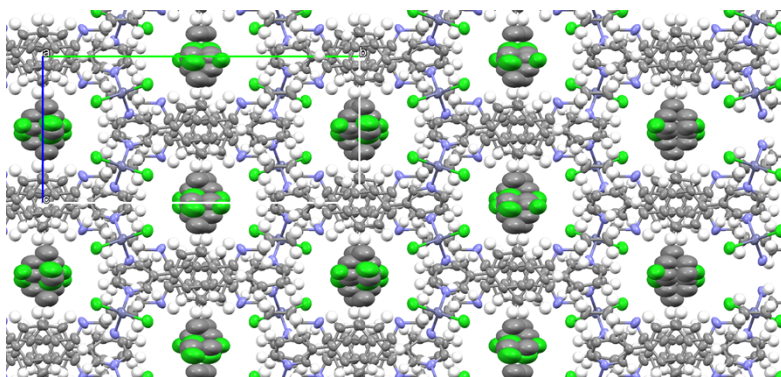

**Figure S4.** SCXRD structure of **1·DCE** viewed along the  $a$ -axis respectively.

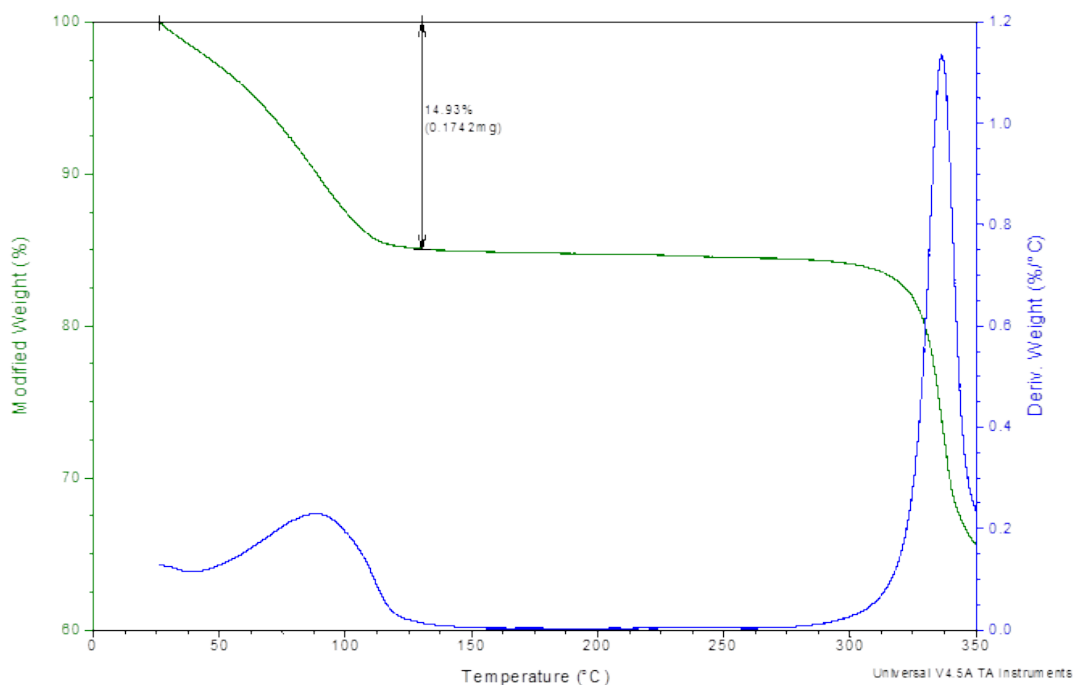

**Figure S5.** TG plot of **1**·TCM. The calculated weight loss obsd (calcd) and temperature are as follows:  $\text{ChCl}_3$  15% (17%), 30 °C-150 °C.

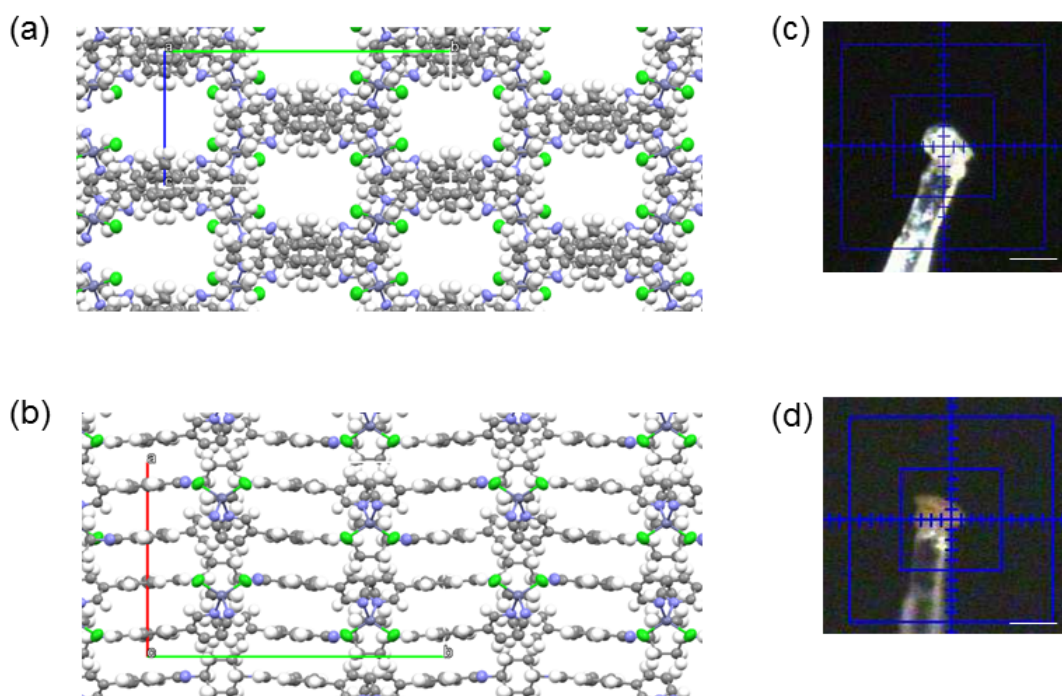

**Figure S6.** SCXRD structure of **1**. (a) and (c) packing viewed along the  $a$ - and  $c$ -axis respectively. (c) and (d) actual single crystal used for the heating experiment. Scale bar 100  $\mu\text{m}$ .

## Absorption Correction Details:

The absorption correction was carried out using SADABS program implemented in the Bruker APEX2 Software Suite.

**L:** Number of reflections was 6554. The R(int) was 0.1433 before and 0.0562 after correction. The Ratio of minimum to maximum transmission is 0.6887.

**1•TCE:** Number of reflections was 11178. The R(int) was 0.1152 before and 0.0541 after correction. The Ratio of minimum to maximum transmission is 0.7965.

**1•DCM:** Number of reflections was 34992. The R(int) was 0.1038 before and 0.0502 after correction. The Ratio of minimum to maximum transmission is 0.6667.

**1•DCE:** Number of reflections was 11886. The R(int) was 0.1052 before and 0.0541 after correction. The Ratio of minimum to maximum transmission is 0.7602.

**1:** Number of reflections was 12502. The R(int) was 0.0553 before and 0.0314 after correction. The Ratio of minimum to maximum transmission is 0.8447.

## checkCIF (standard) running

---

## checkCIF/PLATON (standard)

---

You have not supplied any structure factors. As a result the full set of tests cannot be run.

No syntax errors found.

[CIF dictionary](#)

Please wait while processing ....

[Interpreting this report](#)

**Datablock: jm13\_100k\_0m(L)**

---



Bond precision: C-C = 0.0020 A Wavelength=1.54178

Cell: a=5.5990(4) b=7.1074(5) c=16.1003(11)  
alpha=92.646(4) beta=98.583(4) gamma=112.049(3)

Temperature: 100 K

|                        | Calculated   | Reported     |
|------------------------|--------------|--------------|
| Volume                 | 583.53(7)    | 583.53(7)    |
| Space group            | P -1         | P-1          |
| Hall group             | -P 1         | ?            |
| Moiety formula         | C30 H28 N4   | ?            |
| Sum formula            | C30 H28 N4   | C30 H28 N4   |
| Mr                     | 444.56       | 444.56       |
| Dx, g cm <sup>-3</sup> | 1.265        | 1.265        |
| Z                      | 1            | 1            |
| Mu (mm <sup>-1</sup> ) | 0.584        | 0.584        |
| F000                   | 236.0        | 236.0        |
| F000'                  | 236.62       |              |
| h, k, lmax             | 6, 8, 19     | 6, 8, 19     |
| Nref                   | 2060         | 1997         |
| Tmin, Tmax             | 0.900, 0.916 | 0.518, 0.753 |
| Tmin'                  | 0.890        |              |

Correction method= # Reported T Limits: Tmin=0.518  
Tmax=0.753 AbsCorr = MULTI-SCAN

Data completeness= 0.969 Theta(max)= 66.170

R(reflections)= 0.0394( 1805) wR2(reflections)= 0.1299( 1997)

S = 1.173 Npar= 154

---

The following ALERTS were generated. Each ALERT has the format

**test-name\_ALERT\_alert-type\_alert-level.**

Click on the hyperlinks for more details of the test.

---

### ●Alert level C

[PLAT029\\_ALERT\\_3\\_C\\_diffn\\_measured\\_fraction\\_theta\\_full](#) Low ..... 0.969 Note

[PLAT250 ALERT 2 C](#) Large U3/U1 Ratio for Average U(i,j) Tensor .... 2.1 Note  
[PLAT790 ALERT 4 C](#) Centre of Gravity not Within Unit Cell: Resd. # 1 Note  
C30 H28 N4

---

## ● Alert level G

[PLAT005 ALERT 5 G](#) No \_iucr\_refine\_instructions\_details in the CIF Please Do !  
[PLAT093 ALERT 1 G](#) No su's on H-positions, refinement reported as . mixed Check  
[PLAT899 ALERT 4 G](#) SHELXL97 is Deprecated and Succeeded by SHELXL 2014 Note

---

- 0 **ALERT level A** = Most likely a serious problem - resolve or explain
- 0 **ALERT level B** = A potentially serious problem, consider carefully
- 3 **ALERT level C** = Check. Ensure it is not caused by an omission or oversight
- 3 **ALERT level G** = General information/check it is not something unexpected

- 1 ALERT type 1 CIF construction/syntax error, inconsistent or missing data
  - 1 ALERT type 2 Indicator that the structure model may be wrong or deficient
  - 1 ALERT type 3 Indicator that the structure quality may be low
  - 2 ALERT type 4 Improvement, methodology, query or suggestion
  - 1 ALERT type 5 Informative message, check
- 

It is advisable to attempt to resolve as many as possible of the alerts in all categories. Often the minor alerts point to easily fixed oversights, errors and omissions in your CIF or refinement strategy, so attention to these fine details can be worthwhile. In order to resolve some of the more serious problems it may be necessary to carry out additional measurements or structure refinements. However, the purpose of your study may justify the reported deviations and the more serious of these should normally be commented upon in the discussion or experimental section of a paper or in the "special\_details" fields of the CIF. checkCIF was carefully designed to identify outliers and unusual parameters, but every test has its limitations and alerts that are not important in a particular case may appear. Conversely, the absence of alerts does not guarantee there are no aspects of the results needing attention. It is up to the individual to critically assess their own results and, if necessary, seek expert advice.

### Publication of your CIF in IUCr journals

A basic structural check has been run on your CIF. These basic checks will be run on all CIFs submitted for publication in IUCr journals (*Acta Crystallographica*, *Journal of Applied Crystallography*, *Journal of Synchrotron Radiation*); however, if you intend to submit to *Acta Crystallographica Section C* or *E*, you should make sure that [full publication checks](#) are run on the final version of your CIF prior to submission.

### Publication of your CIF in other journals

Please refer to the *Notes for Authors* of the relevant journal for any special instructions relating to CIF submission.

---

**PLATON version of 21/04/2015; check.def file version of 09/03/2015**

## Datablock jm13\_100k\_0m(L) - ellipsoid plot

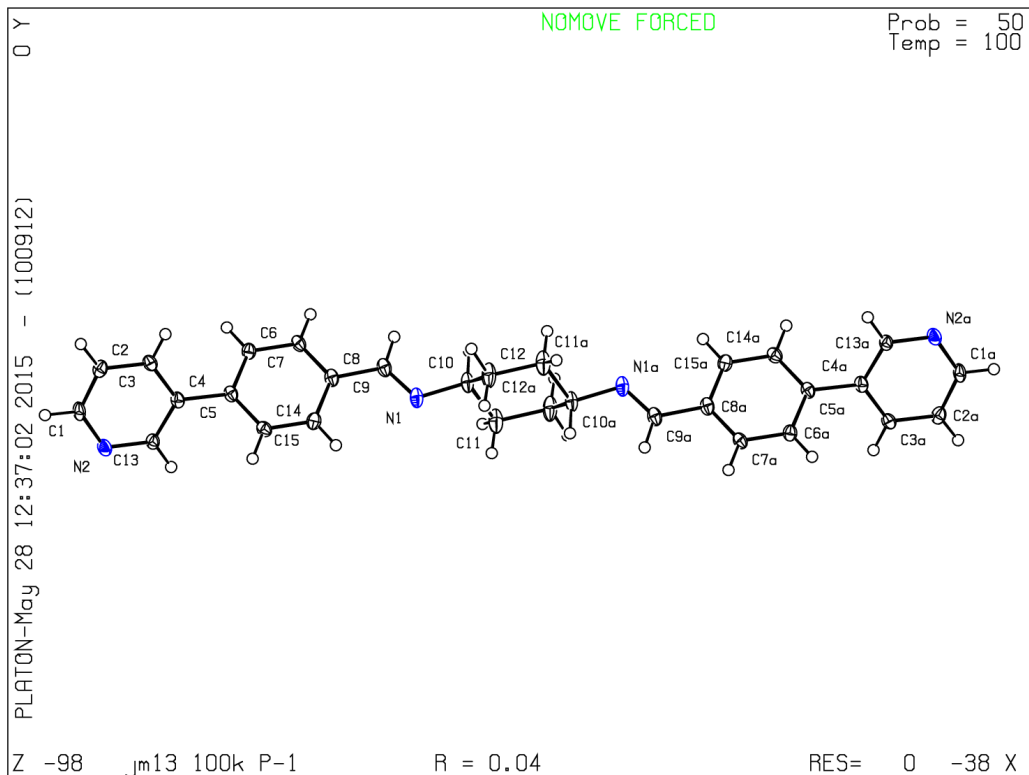

---

## checkCIF (standard) running

---

Checking for embedded fcf data in CIF ...

Found embedded fcf data in CIF. Extracting fcf data from uploaded CIF, please wait . .

## checkCIF/PLATON (standard)

---

Structure factors have been supplied for datablock(s) 1\_CHCl3

THIS REPORT IS FOR GUIDANCE ONLY. IF USED AS PART OF A REVIEW PROCEDURE FOR PUBLICATION, IT SHOULD NOT REPLACE THE EXPERTISE OF AN EXPERIENCED CRYSTALLOGRAPHIC REFEREE.

No syntax errors found.  
Please wait while processing ...  
[Structure factor report](#)

[CIF dictionary](#)  
[Interpreting this report](#)

## Datablock: 1\_CHCl3

---

Bond precision: C-C = 0.0062 Å Wavelength=1.54178

Cell: a=14.6608 (9) b=22.7977 (16) c=9.9218 (7)  
alpha=90 beta=90 gamma=90

Temperature: 100 K

|                        | Calculated                                | Reported          |
|------------------------|-------------------------------------------|-------------------|
| Volume                 | 3316.2 (4)                                | 3316.2 (4)        |
| Space group            | P n n a                                   | P n n a           |
| Hall group             | -P 2a 2bc                                 | -P 2a 2bc         |
| Moiety formula         | C30 H28 Cl2 N4 Zn, 2(C0.50 Cl0.50), 2(Cl) | ?                 |
| Sum formula            | C31 H28 Cl5 N4 Zn                         | C31 H28 Cl5 N4 Zn |
| Mr                     | 699.21                                    | 699.19            |
| Dx, g cm <sup>-3</sup> | 1.401                                     | 1.400             |
| Z                      | 4                                         | 4                 |
| Mu (mm <sup>-1</sup> ) | 4.944                                     | 4.944             |
| F000                   | 1428.0                                    | 1428.0            |
| F000'                  | 1431.70                                   |                   |
| h, k, lmax             | 17, 27, 11                                | 17, 26, 11        |
| Nref                   | 2909                                      | 2870              |
| Tmin, Tmax             | 0.616, 0.743                              | 0.600, 0.753      |
| Tmin'                  | 0.251                                     |                   |

Correction method= # Reported T Limits: Tmin=0.600  
Tmax=0.753 AbsCorr = EMPIRICAL

Data completeness= 0.987 Theta (max)= 66.183

R(reflections)= 0.0760 ( 2638) wR2(reflections)= 0.2268 ( 2870)

S = 1.106

Npar= 221

---

The following ALERTS were generated. Each ALERT has the format

**test-name\_ALERT\_alert-type\_alert-level.**

Click on the hyperlinks for more details of the test.

---

### ●Alert level B

[PLAT018\\_ALERT\\_1\\_B](#) \_diffn\_measured\_fraction\_theta\_max .NE. \_full ! Check

---

### ●Alert level C

[PLAT341\\_ALERT\\_3\\_C](#) Low Bond Precision on C-C Bonds ..... 0.0062 Ang.

[PLAT790\\_ALERT\\_4\\_C](#) Centre of Gravity not Within Unit Cell: Resd. # 1 Note

C30 H28 Cl2 N4 Zn

[PLAT906\\_ALERT\\_3\\_C](#) Large K value in the Analysis of Variance ..... 2.929 Check

[PLAT911\\_ALERT\\_3\\_C](#) Missing # FCF Refl Between THmin & STh/L= 0.593 38 Report

[PLAT918\\_ALERT\\_3\\_C](#) Reflection(s) with I(obs) much smaller I(calc) . 2 Check

[PLAT939\\_ALERT\\_3\\_C](#) Large Value of Not (SHELXL) Weight Optimized S . 10.53

---

### ●Alert level G

[PLAT002\\_ALERT\\_2\\_G](#) Number of Distance or Angle Restraints on AtSite 6 Note

[PLAT003\\_ALERT\\_2\\_G](#) Number of Uiso or Uij Restrained non-H Atoms ... 6 Report

[PLAT004\\_ALERT\\_5\\_G](#) Polymeric Structure Found with Maximum Dimension 1 Info

[PLAT072\\_ALERT\\_2\\_G](#) SHELXL First Parameter in WGHT Unusually Large. 0.14 Report

[PLAT083\\_ALERT\\_2\\_G](#) SHELXL Second Parameter in WGHT Unusually Large. 7.44 Why ?

[PLAT172\\_ALERT\\_4\\_G](#) The CIF-Embedded .res File Contains DFIX Records 1 Report

[PLAT300\\_ALERT\\_4\\_G](#) Atom Site Occupancy of \*Cl11 is Constrained at 0.500 Check

[PLAT300\\_ALERT\\_4\\_G](#) Atom Site Occupancy of \*C51S is Constrained at 0.500 Check

[PLAT302\\_ALERT\\_4\\_G](#) Anion/Solvent Disorder ..... Percentage = 100 Note

[PLAT432\\_ALERT\\_2\\_G](#) Short Inter X...Y Contact Cl2X .. C51S .. 1.73 Ang.

#### And 8 other PLAT432 Alerts

More ...

[PLAT434\\_ALERT\\_2\\_G](#) Short Inter HL..HL Contact Cl1 .. Cl2X .. 3.04 Ang.

[PLAT764\\_ALERT\\_4\\_G](#) Overcomplete CIF Bond List Detected (Rep/Expd) . 1.36 Ratio

[PLAT779\\_ALERT\\_4\\_G](#) Suspect or Irrelevant (Bond) Angle in CIF .... # 76 Check

CL2X -C51S -CL3X 1.555 1.555 4.555 31.10 Deg.

[PLAT860\\_ALERT\\_3\\_G](#) Number of Least-Squares Restraints ..... 68 Note

[PLAT909\\_ALERT\\_3\\_G](#) Percentage of Observed Data at Theta(Max) still 87 %

[PLAT910\\_ALERT\\_3\\_G](#) Missing # of FCF Reflection(s) Below Th(Min) ... 1 Report

---

0 **ALERT level A** = Most likely a serious problem - resolve or explain

1 **ALERT level B** = A potentially serious problem, consider carefully

6 **ALERT level C** = Check. Ensure it is not caused by an omission or oversight

24 **ALERT level G** = General information/check it is not something unexpected

1 ALERT type 1 CIF construction/syntax error, inconsistent or missing data

14 ALERT type 2 Indicator that the structure model may be wrong or deficient

8 ALERT type 3 Indicator that the structure quality may be low

7 ALERT type 4 Improvement, methodology, query or suggestion

1 ALERT type 5 Informative message, check

---

---

It is advisable to attempt to resolve as many as possible of the alerts in all categories. Often the minor alerts point to easily fixed oversights, errors and omissions in your CIF or refinement strategy, so attention to these fine details can be worthwhile. In order to resolve some of the more serious problems it may be necessary to carry out additional measurements or structure refinements. However, the purpose of your study may justify the reported deviations and the more serious of these should normally be commented upon in the discussion or experimental section of a paper or in the "special\_details" fields of the CIF. checkCIF was carefully designed to identify outliers and unusual parameters, but every test has its limitations and alerts that are not important in a particular case may appear. Conversely, the absence of alerts does not guarantee there are no aspects of the results needing attention. It is up to the individual to critically assess their own results and, if necessary, seek expert advice.

### **Publication of your CIF in IUCr journals**

A basic structural check has been run on your CIF. These basic checks will be run on all CIFs submitted for publication in IUCr journals (*Acta Crystallographica*, *Journal of Applied Crystallography*, *Journal of Synchrotron Radiation*); however, if you intend to submit to *Acta Crystallographica Section C* or *E*, you should make sure that [full publication checks](#) are run on the final version of your CIF prior to submission.

### **Publication of your CIF in other journals**

Please refer to the *Notes for Authors* of the relevant journal for any special instructions relating to CIF submission.

---

**PLATON version of 21/04/2015; check.def file version of 09/03/2015**

## **Datablock 1\_CHCl3 - ellipsoid plot**

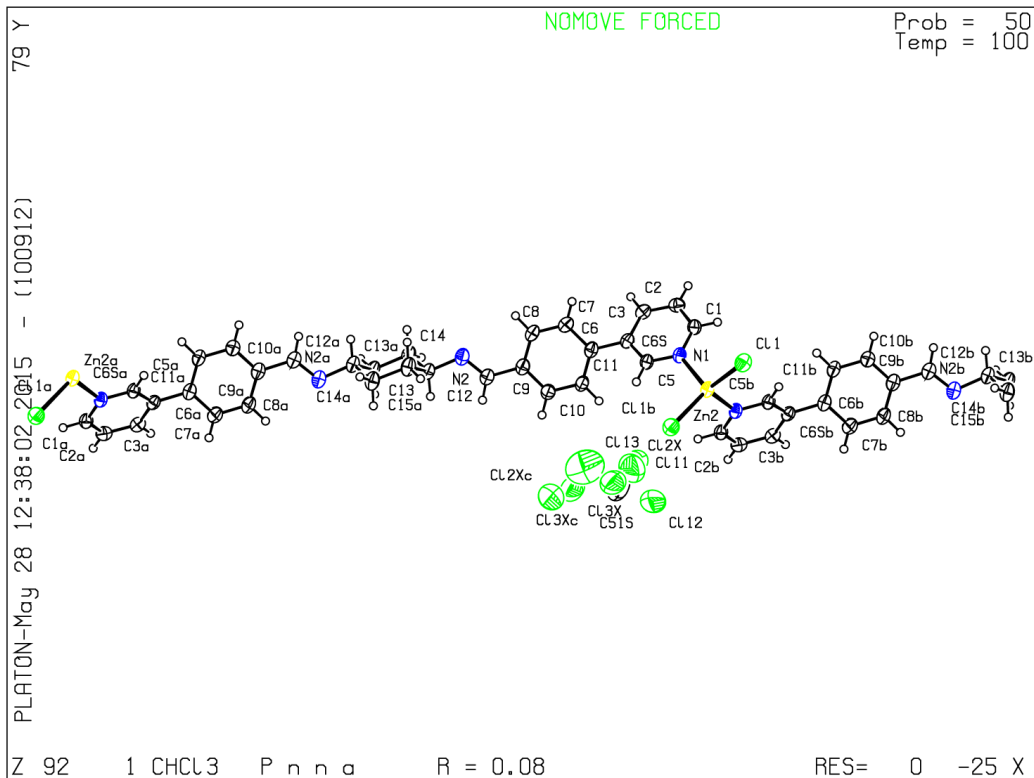


---

## checkCIF (standard) running

---

Checking for embedded fcf data in CIF ...

Found embedded fcf data in CIF. Extracting fcf data from uploaded CIF, please wait ...

## checkCIF/PLATON (standard)

---

Structure factors have been supplied for datablock(s) 1\_DCM

THIS REPORT IS FOR GUIDANCE ONLY. IF USED AS PART OF A REVIEW PROCEDURE FOR PUBLICATION, IT SHOULD NOT REPLACE THE EXPERTISE OF AN EXPERIENCED CRYSTALLOGRAPHIC REFEREE.

No syntax errors found.  
Please wait while processing ....  
[Structure factor report](#)

[CIF dictionary](#)  
[Interpreting this report](#)

## Datablock: 1\_DCM

---

Bond precision: C-C = 0.0053 Å Wavelength=1.54178

Cell: a=14.6639 (9) b=22.7525 (14) c=9.8535 (6)

alpha=90 beta=90 gamma=90

Temperature: 100 K

|                        | Calculated                                           | Reported           |
|------------------------|------------------------------------------------------|--------------------|
| Volume                 | 3287.5(3)                                            | 3287.5(3)          |
| Space group            | P n n a                                              | P n n a            |
| Hall group             | -P 2a 2bc                                            | -P 2a 2bc          |
| Moiety formula         | C30 H28 Cl2 N4 Zn, 0.387(C2 H4 Cl4), 0.226(C H2 Cl2) | ?                  |
| Sum formula            | C31 H30 Cl4 N4 Zn                                    | C62 H60 Cl8 N8 Zn2 |
| Mr                     | 665.78                                               | 1331.52            |
| Dx, g cm <sup>-3</sup> | 1.345                                                | 1.345              |
| Z                      | 4                                                    | 2                  |
| Mu (mm <sup>-1</sup> ) | 4.228                                                | 4.228              |
| F000                   | 1368.0                                               | 1368.0             |
| F000'                  | 1370.21                                              |                    |
| h, k, lmax             | 17, 26, 11                                           | 17, 26, 11         |
| Nref                   | 2870                                                 | 2848               |
| Tmin, Tmax             | 0.632, 0.776                                         | 0.502, 0.753       |
| Tmin'                  | 0.268                                                |                    |

Correction method= # Reported T Limits: Tmin=0.502  
Tmax=0.753 AbsCorr = EMPIRICAL

Data completeness= 0.992 Theta (max)= 65.999

R(reflections)= 0.0696( 2672) wR2(reflections)= 0.1885( 2848)



S = 0.970

Npar= 240

---

The following ALERTS were generated. Each ALERT has the format

**test-name\_ALERT\_alert-type\_alert-level.**

Click on the hyperlinks for more details of the test.

---

### ●Alert level A

[SHFSU01\\_ALERT\\_2\\_A](#) The absolute value of parameter shift to su ratio > 0.20

Absolute value of the parameter shift to su ratio given 1.446

Additional refinement cycles may be required.

**Author Response: This is due to the disordered guest.**

[PLAT080\\_ALERT\\_2\\_A](#) Maximum Shift/Error ..... 1.45 Why ?

**Author Response: This is due to the disordered guest.**

---

### ●Alert level B

[PLAT018\\_ALERT\\_1\\_B](#) \_diffn\_measured\_fraction\_theta\_max .NE. \_full ! Check

---

### ●Alert level C

[RINTA01\\_ALERT\\_3\\_C](#) The value of Rint is greater than 0.12

Rint given 0.171

[PLAT790\\_ALERT\\_4\\_C](#) Centre of Gravity not Within Unit Cell: Resd. # 1 Note

C30 H28 Cl2 N4 Zn

[PLAT906\\_ALERT\\_3\\_C](#) Large K value in the Analysis of Variance ..... 2.087 Check

[PLAT911\\_ALERT\\_3\\_C](#) Missing # FCF Refl Between THmin & STh/L= 0.593 22 Report

[PLAT913\\_ALERT\\_3\\_C](#) Missing # of Very Strong Reflections in FCF .... 1 Note

---

### ●Alert level G

[PLAT002\\_ALERT\\_2\\_G](#) Number of Distance or Angle Restraints on AtSite 9 Note

[PLAT003\\_ALERT\\_2\\_G](#) Number of Uiso or Uij Restrained non-H Atoms ... 9 Report

[PLAT004\\_ALERT\\_5\\_G](#) Polymeric Structure Found with Maximum Dimension 1 Info

[PLAT045\\_ALERT\\_1\\_G](#) Calculated and Reported Z Differ by ..... 2.00 Ratio

[PLAT072\\_ALERT\\_2\\_G](#) SHELXL First Parameter in WGHT Unusually Large. 0.12 Report

[PLAT083\\_ALERT\\_2\\_G](#) SHELXL Second Parameter in WGHT Unusually Large. 10.27 Why ?

[PLAT172\\_ALERT\\_4\\_G](#) The CIF-Embedded .res File Contains DFIX Records 1 Report

[PLAT302\\_ALERT\\_4\\_G](#) Anion/Solvent Disorder ..... Percentage = 100 Note

[PLAT434\\_ALERT\\_2\\_G](#) Short Inter HL..HL Contact Cl2 .. Cl1Q .. 3.12 Ang.

[PLAT720\\_ALERT\\_4\\_G](#) Number of Unusual/Non-Standard Labels ..... 6 Note

[PLAT860\\_ALERT\\_3\\_G](#) Number of Least-Squares Restraints ..... 144 Note

[PLAT909\\_ALERT\\_3\\_G](#) Percentage of Observed Data at Theta(Max) still 83 %

[PLAT910\\_ALERT\\_3\\_G](#) Missing # of FCF Reflection(s) Below Th(Min) ... 1 Report

---

2 **ALERT level A** = Most likely a serious problem - resolve or explain

1 **ALERT level B** = A potentially serious problem, consider carefully

5 **ALERT level C** = Check. Ensure it is not caused by an omission or oversight

13 **ALERT level G** = General information/check it is not something unexpected

2 ALERT type 1 CIF construction/syntax error, inconsistent or missing data

7 ALERT type 2 Indicator that the structure model may be wrong or deficient

7 ALERT type 3 Indicator that the structure quality may be low  
4 ALERT type 4 Improvement, methodology, query or suggestion  
1 ALERT type 5 Informative message, check

---

---

It is advisable to attempt to resolve as many as possible of the alerts in all categories. Often the minor alerts point to easily fixed oversights, errors and omissions in your CIF or refinement strategy, so attention to these fine details can be worthwhile. In order to resolve some of the more serious problems it may be necessary to carry out additional measurements or structure refinements. However, the purpose of your study may justify the reported deviations and the more serious of these should normally be commented upon in the discussion or experimental section of a paper or in the "special\_details" fields of the CIF. checkCIF was carefully designed to identify outliers and unusual parameters, but every test has its limitations and alerts that are not important in a particular case may appear. Conversely, the absence of alerts does not guarantee there are no aspects of the results needing attention. It is up to the individual to critically assess their own results and, if necessary, seek expert advice.

### **Publication of your CIF in IUCr journals**

A basic structural check has been run on your CIF. These basic checks will be run on all CIFs submitted for publication in IUCr journals (*Acta Crystallographica*, *Journal of Applied Crystallography*, *Journal of Synchrotron Radiation*); however, if you intend to submit to *Acta Crystallographica Section C* or *E*, you should make sure that [full publication checks](#) are run on the final version of your CIF prior to submission.

### **Publication of your CIF in other journals**

Please refer to the *Notes for Authors* of the relevant journal for any special instructions relating to CIF submission.

---

**PLATON version of 21/04/2015; check.def file version of 09/03/2015**

## **Datablock 1\_DCM - ellipsoid plot**



No syntax errors found.  
Please wait while processing ....  
[Structure factor report](#)

[CIF dictionary](#)  
[Interpreting this report](#)

## Datablock: 1\_dce

---

Bond precision: C-C = 0.0058 A Wavelength=1.54178

Cell: a=14.7255 (9) b=22.4827 (15) c=10.2852 (7)  
alpha=90 beta=90 gamma=90

Temperature: 100 K

|                        | Calculated                                           | Reported          |
|------------------------|------------------------------------------------------|-------------------|
| Volume                 | 3405.1 (4)                                           | 3405.1 (4)        |
| Space group            | P n n a                                              | P n n a           |
| Hall group             | -P 2a 2bc                                            | -P 2a 2bc         |
| Moiety formula         | C30 H28 Cl2 N4 Zn, 0.398 (C4),<br>0.204 (C2), 2 (Cl) | ?                 |
| Sum formula            | C32 H28 Cl4 N4 Zn                                    | C32 H28 Cl4 N4 Zn |
| Mr                     | 675.77                                               | 675.75            |
| Dx, g cm <sup>-3</sup> | 1.318                                                | 1.318             |
| Z                      | 4                                                    | 4                 |
| Mu (mm <sup>-1</sup> ) | 4.092                                                | 4.092             |
| F000                   | 1384.0                                               | 1384.0            |
| F000'                  | 1386.28                                              |                   |
| h, k, lmax             | 17, 26, 12                                           | 17, 26, 11        |
| Nref                   | 2944                                                 | 2844              |
| Tmin, Tmax             | 0.659, 0.782                                         | 0.577, 0.753      |
| Tmin'                  | 0.322                                                |                   |

Correction method= # Reported T Limits: Tmin=0.577  
Tmax=0.753 AbsCorr = EMPIRICAL

Data completeness= 0.966 Theta (max)= 65.608

R(reflections)= 0.0765 ( 2288) wR2(reflections)= 0.2187 ( 2844)

S = 1.053

Npar= 225

---

The following ALERTS were generated. Each ALERT has the format

**test-name\_ALERT\_alert-type\_alert-level.**

Click on the hyperlinks for more details of the test.

---

### ● Alert level B

[RINTA01\\_ALERT\\_3\\_B](#) The value of Rint is greater than 0.18

Rint given 0.184

[PLATO18\\_ALERT\\_1\\_B](#) \_diffrn\_measured\_fraction\_theta\_max .NE. \_full ! Check

[PLATO20\\_ALERT\\_3\\_B](#) The value of Rint is greater than 0.12 ..... 0.184 Report

---

### ● Alert level C

[PLATO94\\_ALERT\\_2\\_C](#) Ratio of Maximum / Minimum Residual Density .... 2.07 Report

[PLAT790\\_ALERT\\_4\\_C](#) Centre of Gravity not Within Unit Cell: Resd. # 1 Note

C30 H28 Cl2 N4 Zn

[PLAT911\\_ALERT\\_3\\_C](#) Missing # FCF Refl Between THmin & STh/L= 0.591 91 Report

---

### ● Alert level G

[PLAT002\\_ALERT\\_2\\_G](#) Number of Distance or Angle Restraints on AtSite 6 Note

[PLAT003\\_ALERT\\_2\\_G](#) Number of Uiso or Uij Restrained non-H Atoms ... 6 Report

[PLAT004\\_ALERT\\_5\\_G](#) Polymeric Structure Found with Maximum Dimension 1 Info

[PLAT072\\_ALERT\\_2\\_G](#) SHELXL First Parameter in WGHT Unusually Large. 0.15 Report

[PLAT172\\_ALERT\\_4\\_G](#) The CIF-Embedded .res File Contains DFIX Records 2 Report

[PLAT178\\_ALERT\\_4\\_G](#) The CIF-Embedded .res File Contains SIMU Records 1 Report

[PLAT302\\_ALERT\\_4\\_G](#) Anion/Solvent Disorder ..... Percentage = 100 Note

[PLAT432\\_ALERT\\_2\\_G](#) Short Inter X...Y Contact C7 .. C4T .. 3.19 Ang.

[PLAT432\\_ALERT\\_2\\_G](#) Short Inter X...Y Contact C8 .. C4T .. 3.13 Ang.

[PLAT764\\_ALERT\\_4\\_G](#) Overcomplete CIF Bond List Detected (Rep/Expd) . 1.20 Ratio

[PLAT773\\_ALERT\\_2\\_G](#) Check long C-C Bond in CIF: C4S -- C4T . 1.80 Ang.

[PLAT779\\_ALERT\\_4\\_G](#) Suspect or Irrelevant (Bond) Angle in CIF .... # 36 Check

C3S -C3S -C3T 2.665 1.555 2.665 28.00 Deg.

[PLAT779\\_ALERT\\_4\\_G](#) Suspect or Irrelevant (Bond) Angle in CIF .... # 40 Check

C3T -CL3 -C3S 1.555 1.555 1.555 24.00 Deg.

[PLAT779\\_ALERT\\_4\\_G](#) Suspect or Irrelevant (Bond) Angle in CIF .... # 43 Check

C3T -C3T -C3S 2.665 1.555 2.665 28.00 Deg.

[PLAT860\\_ALERT\\_3\\_G](#) Number of Least-Squares Restraints ..... 70 Note

[PLAT909\\_ALERT\\_3\\_G](#) Percentage of Observed Data at Theta(Max) still 52 %

[PLAT910\\_ALERT\\_3\\_G](#) Missing # of FCF Reflection(s) Below Th(Min) ... 1 Report

---

0 **ALERT level A** = Most likely a serious problem - resolve or explain

3 **ALERT level B** = A potentially serious problem, consider carefully

3 **ALERT level C** = Check. Ensure it is not caused by an omission or oversight

17 **ALERT level G** = General information/check it is not something unexpected

1 ALERT type 1 CIF construction/syntax error, inconsistent or missing data

7 ALERT type 2 Indicator that the structure model may be wrong or deficient

6 ALERT type 3 Indicator that the structure quality may be low

8 ALERT type 4 Improvement, methodology, query or suggestion

1 ALERT type 5 Informative message, check

---

---

It is advisable to attempt to resolve as many as possible of the alerts in all categories. Often the minor alerts point to easily fixed oversights, errors and omissions in your CIF or refinement strategy, so attention to these fine details can be worthwhile. In order to resolve some of the more serious problems it may be necessary to carry out additional measurements or structure refinements. However, the purpose of your study may justify the reported deviations and the more serious of these should normally be commented upon in the discussion or experimental section of a paper or in the "special\_details" fields of the CIF. checkCIF was carefully designed to identify outliers and unusual parameters, but every test has its limitations and alerts that are not important in a particular case may appear. Conversely, the absence of alerts does not guarantee there are no aspects of the results needing attention. It is up to the individual to critically assess their own results and, if necessary, seek expert advice.

### **Publication of your CIF in IUCr journals**

A basic structural check has been run on your CIF. These basic checks will be run on all CIFs submitted for publication in IUCr journals (*Acta Crystallographica*, *Journal of Applied Crystallography*, *Journal of Synchrotron Radiation*); however, if you intend to submit to *Acta Crystallographica Section C* or *E*, you should make sure that [full publication checks](#) are run on the final version of your CIF prior to submission.

### **Publication of your CIF in other journals**

Please refer to the *Notes for Authors* of the relevant journal for any special instructions relating to CIF submission.

---

**PLATON version of 21/04/2015; check.def file version of 09/03/2015**

## **Datablock 1\_dce - ellipsoid plot**

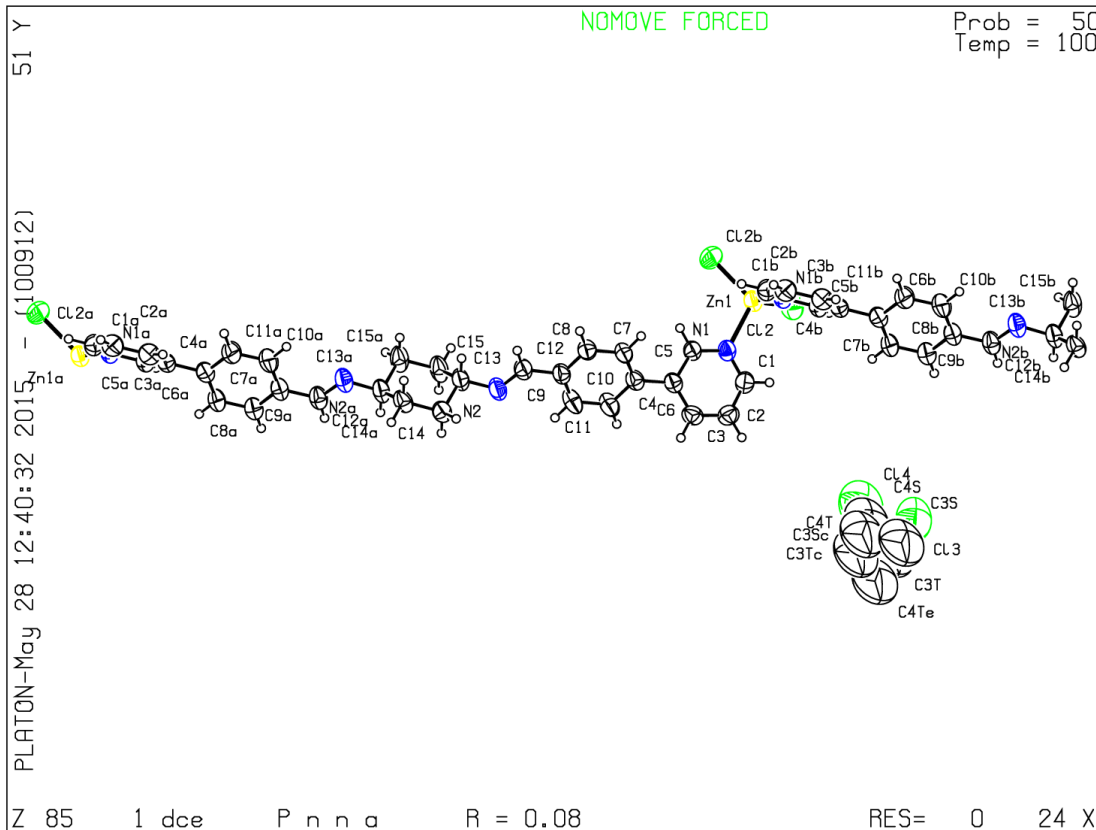


---

**checkCIF (standard) running**

---

**checkCIF/PLATON (standard)**

---

You have not supplied any structure factors. As a result the full set of tests cannot be run.

No syntax errors found.

Please wait while processing ....

[CIF dictionary](#)

[Interpreting this report](#)

**Datablock: 400k(1)**

---

Bond precision: C-C = 0.0103 Å Wavelength=1.54178

Cell: a=14.7556(10) b=22.5021(14) c=10.5208(7)

alpha=90 beta=90 gamma=90

Temperature: 399 K

|                        | Calculated        | Reported          |
|------------------------|-------------------|-------------------|
| Volume                 | 3493.2(4)         | 3493.2(4)         |
| Space group            | P n n a           | Pnna              |
| Hall group             | -P 2a 2bc         | ?                 |
| Moiety formula         | C30 H28 Cl2 N4 Zn | ?                 |
| Sum formula            | C30 H28 Cl2 N4 Zn | C30 H28 Cl2 N4 Zn |
| Mr                     | 580.85            | 580.83            |
| Dx, g cm <sup>-3</sup> | 1.105             | 1.104             |
| Z                      | 4                 | 4                 |
| Mu (mm <sup>-1</sup> ) | 2.539             | 2.539             |
| F000                   | 1200.0            | 1200.0            |
| F000'                  | 1199.18           |                   |
| h, k, lmax             | 17, 26, 12        | 17, 26, 12        |
| Nref                   | 3058              | 3008              |
| Tmin, Tmax             | 0.808, 0.881      | 0.636, 0.753      |
| Tmin'                  | 0.737             |                   |

Correction method= # Reported T Limits: Tmin=0.636  
Tmax=0.753 AbsCorr = EMPIRICAL

Data completeness= 0.984 Theta(max)= 66.110

R(reflections)= 0.1020( 1849) wR2(reflections)= 0.3315( 3008)

S = 1.131 Npar= 168

---

The following ALERTS were generated. Each ALERT has the format

**test-name\_ALERT\_alert-type\_alert-level.**

Click on the hyperlinks for more details of the test.

---

## **Alert level A**

[PLAT601\\_ALERT\\_2\\_A](#) Structure Contains Solvent Accessible VOIDS of . 471 Ang3



**Author Response: This is expected as an avacuated channel upon heating to 400K"**

---

## ●Alert level C

[RFACG01 ALERT 3 C](#) The value of the R factor is > 0.10

R factor given 0.102

[RFACR01 ALERT 3 C](#) The value of the weighted R factor is > 0.25

Weighted R factor given 0.331

[PLAT084 ALERT 3 C](#) High wR2 Value (i.e. > 0.25) ..... 0.33 Report

[PLAT094 ALERT 2 C](#) Ratio of Maximum / Minimum Residual Density .... 2.74 Report

[PLAT234 ALERT 4 C](#) Large Hirshfeld Difference C8 -- C9 .. 0.17 Ang.

[PLAT241 ALERT 2 C](#) High Ueq as Compared to Neighbors for ..... C8 Check

[PLAT242 ALERT 2 C](#) Low Ueq as Compared to Neighbors for ..... Zn1 Check

[PLAT341 ALERT 3 C](#) Low Bond Precision on C-C Bonds ..... 0.0103 Ang.

---

## ●Alert level G

[PLAT004 ALERT 5 G](#) Polymeric Structure Found with Maximum Dimension 1 Info

[PLAT005 ALERT 5 G](#) No \_iucr\_refine\_instructions\_details in the CIF Please Do !

[PLAT072 ALERT 2 G](#) SHELXL First Parameter in WGHT Unusually Large. 0.20 Report

[PLAT093 ALERT 1 G](#) No su's on H-positions, refinement reported as . mixed Check

[PLAT899 ALERT 4 G](#) SHELXL97 is Deprecated and Succeeded by SHELXL 2014 Note

---

1 **ALERT level A** = Most likely a serious problem - resolve or explain

0 **ALERT level B** = A potentially serious problem, consider carefully

8 **ALERT level C** = Check. Ensure it is not caused by an omission or oversight

5 **ALERT level G** = General information/check it is not something unexpected

1 ALERT type 1 CIF construction/syntax error, inconsistent or missing data

5 ALERT type 2 Indicator that the structure model may be wrong or deficient

4 ALERT type 3 Indicator that the structure quality may be low

2 ALERT type 4 Improvement, methodology, query or suggestion

2 ALERT type 5 Informative message, check

---

It is advisable to attempt to resolve as many as possible of the alerts in all categories. Often the minor alerts point to easily fixed oversights, errors and omissions in your CIF or refinement strategy, so attention to these fine details can be worthwhile. In order to resolve some of the more serious problems it may be necessary to carry out additional measurements or structure refinements. However, the purpose of your study may justify the reported deviations and the more serious of these should normally be commented upon in the discussion or experimental section of a paper or in the "special\_details" fields of the CIF. checkCIF was carefully designed to identify outliers and unusual parameters, but every test has its limitations and alerts that are not important in a particular case may appear. Conversely, the absence of alerts does not guarantee there are no aspects of the results needing attention. It is up to the individual to critically assess their own results and, if necessary, seek expert advice.

## Publication of your CIF in IUCr journals

A basic structural check has been run on your CIF. These basic checks will be run on all CIFs submitted for publication in IUCr journals (*Acta Crystallographica*, *Journal of Applied Crystallography*, *Journal of Synchrotron Radiation*); however, if you intend to submit to *Acta Crystallographica Section C* or *E*, you should

make sure that [full publication checks](#) are run on the final version of your CIF prior to submission.

### Publication of your CIF in other journals

Please refer to the *Notes for Authors* of the relevant journal for any special instructions relating to CIF submission.

---

PLATON version of 21/04/2015; check.def file version of 09/03/2015

## Datablock 400k(1) - ellipsoid plot

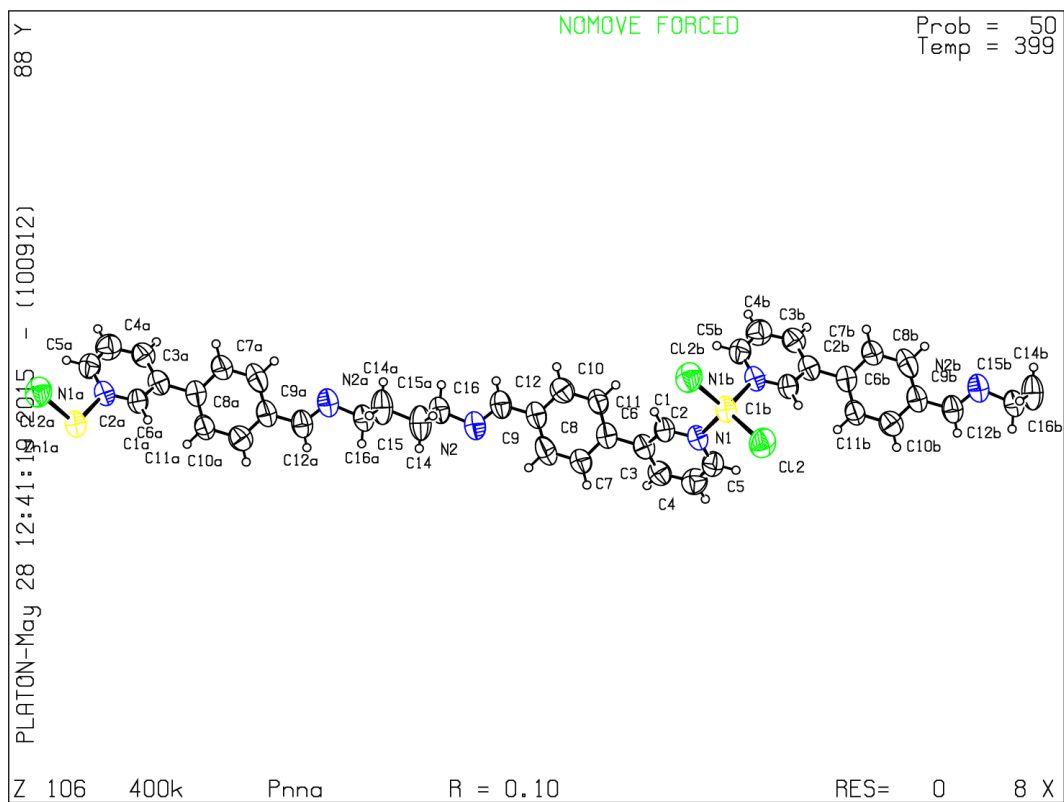

Supplement: c5cc02372f1.pdf [file c5cc02372f1.pdf]
